# Supplementary material for: Triple click chemistry for crosslinking, stiffening, and annealing of gelatin-based microgels
Source: Royal Society of Chemistry journal article supplement (doi:10.1039/d3lp00249g), 2024-01-01
Supplement: d3lp00249g1.pdf [file d3lp00249g1.pdf]

## **Triple click chemistry for crosslinking, stiffening, and annealing of gelatin-based microgels**

Chun-Yi Chang,<sup>1</sup> Han Nguyen,<sup>1</sup> Ellen Frahm,<sup>2</sup> Keith Kolaczyk,<sup>2</sup> Chien-Chi Lin.<sup>1,2,3,4,\*</sup>

<sup>1</sup>Weldon School of Biomedical Engineering, Purdue University, West Lafayette, IN 47907, USA.

<sup>2</sup>Department of Biomedical Engineering, Indiana University-Purdue University Indianapolis, Indianapolis, IN 46202, USA.

<sup>3</sup>Indiana University Melvin and Bren Simon Comprehensive Cancer Center, Indianapolis, IN 46202, USA.

<sup>4</sup>Integrated Nanosystems Development Institute, Indianapolis, IN 46202, USA.

### **Supplementary information**

\* To whom correspondence should be sent:

Chien-Chi Lin, PhD.

Thomas J Linnemeier Guidant Foundation Endowed Chair & Professor

Department of Biomedical Engineering

Purdue School of Engineering & Technology

Indiana University-Purdue University Indianapolis

Indianapolis, IN 46202, USA

Phone: (317) 274-0760

Email: [lincc@iupui.edu](mailto:lincc@iupui.edu)

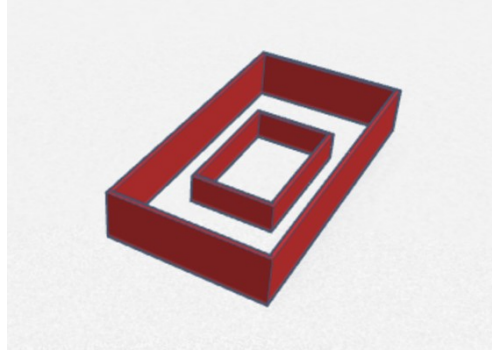

**Figure S1.** Screenshot of the STL file for 3D printing of mold/reservoir to create TC-MAP gel for cell culture. TC-MAP gel was deposited in the center mold (width x length x height = 5.6 mm x 9.6 mm x 4 mm), while the outer space served as a reservoir for cell culture media (width x length x height = 11 mm x 22 mm x 7 mm). Wall thickness = 0.25 mm.

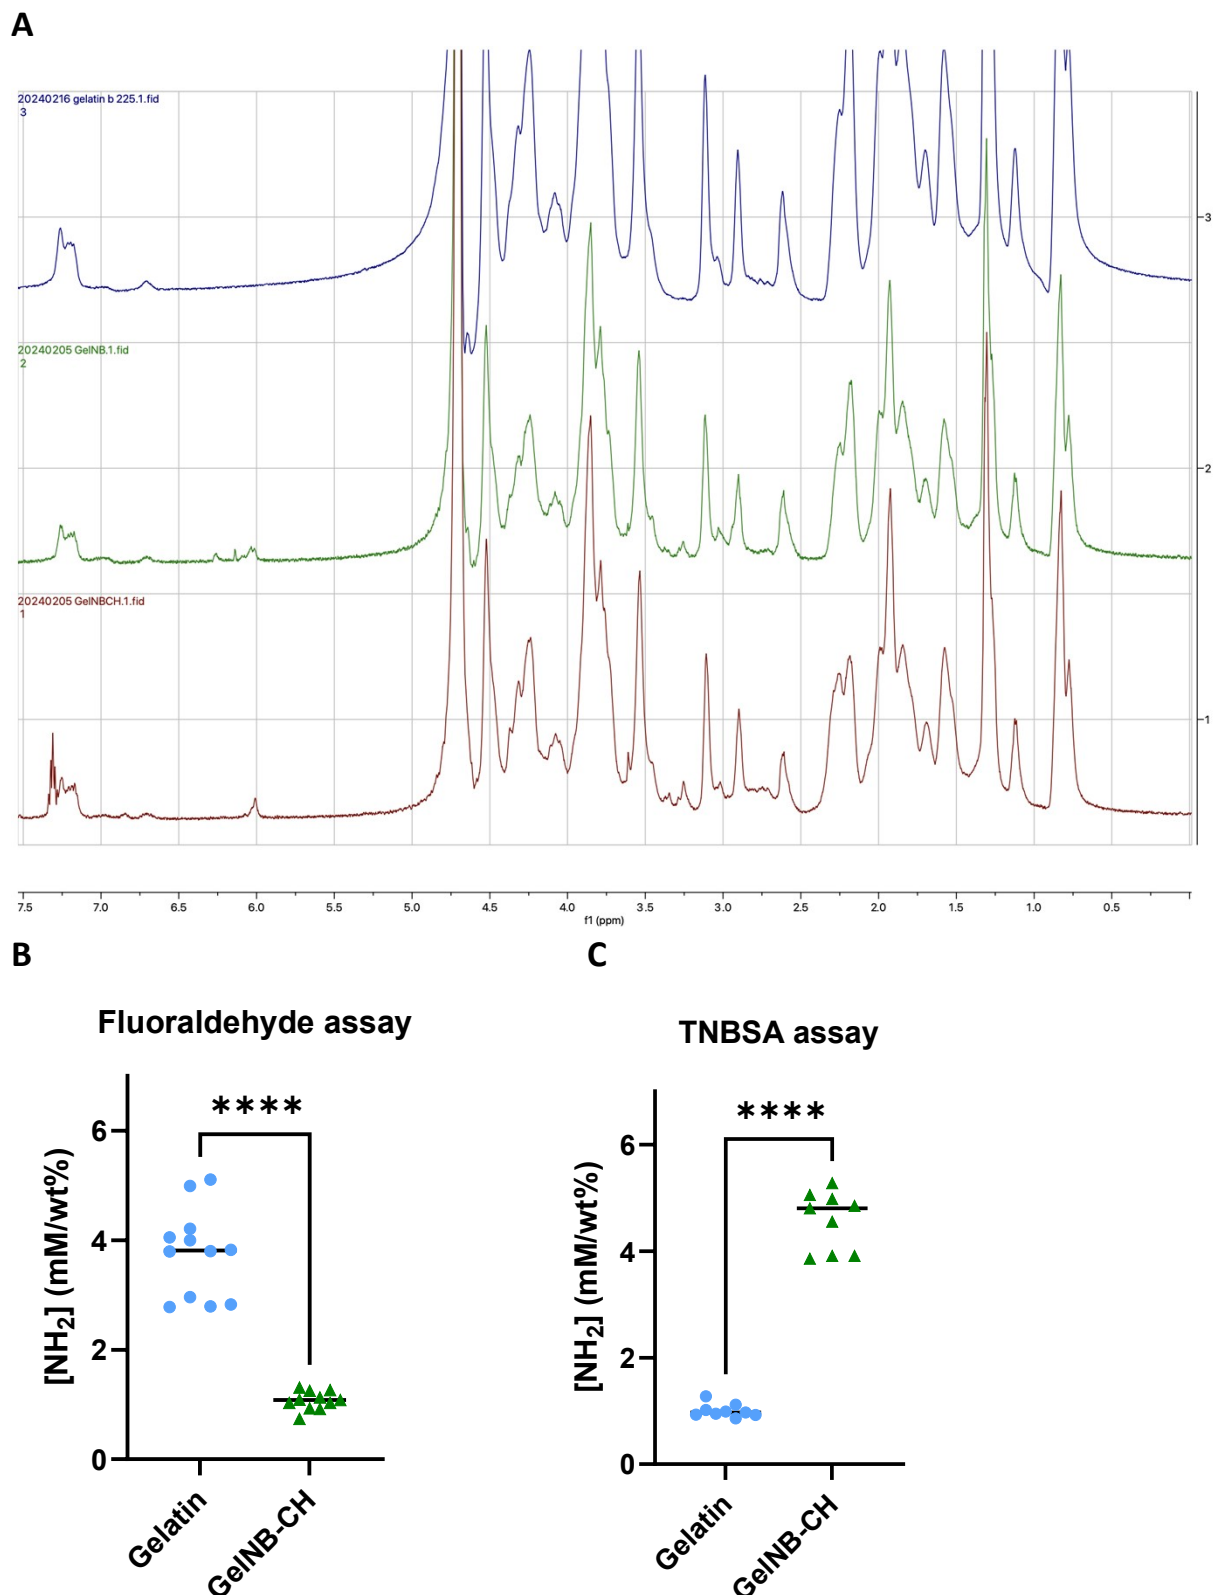

**Figure S2.** (A) NMR spectra of gelatin, GeINB, and GeINB-CH. The peak at 6 ppm is assigned to the vinyl protons on the norbornene group, and the peak at 2.2 ppm is assigned to glutamic acid and hydroxyproline.<sup>7</sup> (B) Fluoraldehyde assay results for amine concentrations on gelatin and GeINB-CH. (C) TNBSA assay results for acid concentrations on gelatin and GeINB-CH (\*\*\*\*  $p < 0.0001$ ).

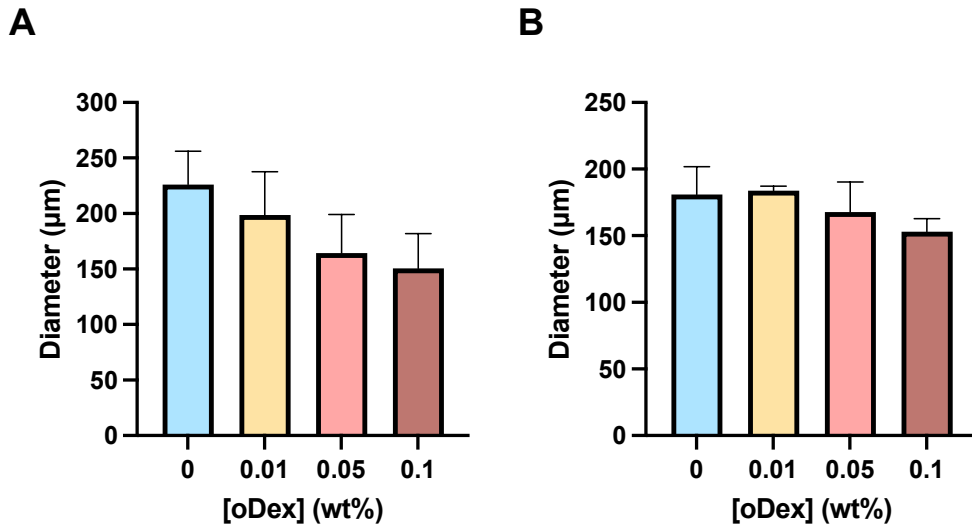

**Figure S3.** Changes of microgel diameters as a function of oDex concentration. (A) Microgels prepared by microfluidic droplet generator. (B) Microgels prepared by the emulsion method. Data represents the average diameters of three independent experiments (N=3, Mean  $\pm$  SEM). There is no significant statistical difference between any stiffened and non-stiffened microgel size.

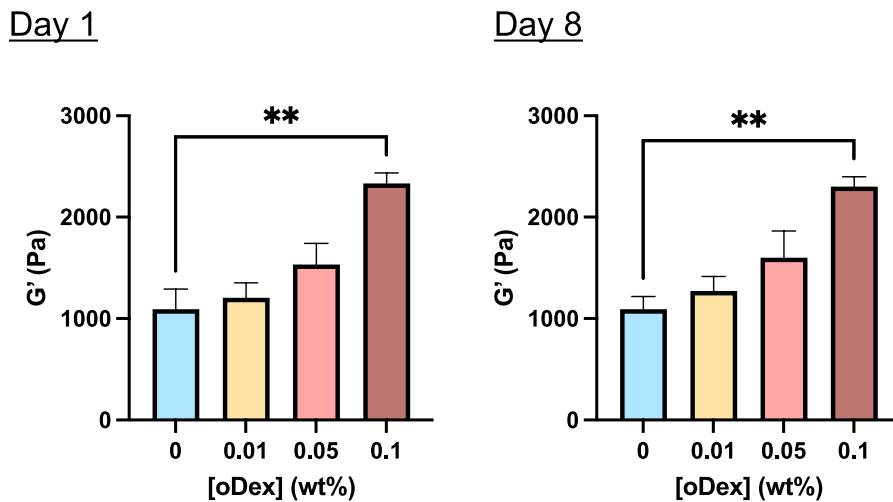

**Figure S4.** MAP gel bulk stiffness on D1 and D8. Data represents the average moduli of three independent experiments (Mean  $\pm$  SEM). \*\*: p < 0.01.
